# Supplementary material for: Distinguishing between recruitment and spread of silent chromatin structures in Saccharomyces cerevisiae
Source: eLife. 2022 Jan 24;11:e75653. doi: 10.7554/eLife.75653 (PMC8830885; doi:10.7554/eLife.75653)
Supplement: Supplementary file 1. [file elife-75653-supp1.xlsx]

## Sheet: Sheet1
Table S1. Strains used in this study
[…] : plasmid number, found in Table S3
K.l. : Kluyveromyces lactis
Strain Number	MAT	Genotype	Published Source
JRY09316	∆	can1-100, his3-11,15, leu2-3,112, lys2, trp1-1, ura3-1, mat∆::HphMX,	Teytelman et al. 2013
JRY11699	∆	can1-100, his3-11,15, leu2-3,112, lys2, trp1-1, ura3-1, mat∆::K.l.LEU2	Brothers & Rine 2019
JRY12601	∆	can1-100, his3-11,15, leu2-3,112, lys2, trp1-1, ura3-1, mat∆::K.l.LEU2, SIR3-3xV5-NatMX	This study
JRY12731	∆	can1-100, his3-11,15, leu2-3,112, lys2, trp1-1, ura3-1, mat∆::K.l.LEU2, hmlα2∆::yEmRFP, hmrα2∆::yEGFP	This study
JRY12838	∆	can1-100, his3-11,15, leu2-3,112, lys2, trp1-1, ura3-1, mat∆::K.l.LEU2, sir3∆::M.ECOGII-NatMX	This study
JRY12839	∆	can1-100, his3-11,15, leu2-3,112, lys2, trp1-1, ura3-1, mat∆::K.l.LEU2, SIR3-M.ECOGII-3xV5-NatMX	This study
JRY12840	∆	can1-100, his3-11,15, leu2-3,112, lys2, trp1-1, ura3-1, mat∆::K.l.LEU2, SIR3-M.ECOGII-NatMX	This study
JRY12842	∆	can1-100, his3-11,15, leu2-3,112, lys2, trp1-1, ura3-1, mat∆::K.l.LEU2, hmlα2∆::yEmRFP, hmrα2∆::yEGFP, sir3∆::M.ECOGII-NatMX	This study
JRY12844	∆	can1-100, his3-11,15, leu2-3,112, lys2, trp1-1, ura3-1, mat∆::K.l.LEU2, hmlα2∆::yEmRFP, hmrα2∆::yEGFP, SIR3-M.ECOGII-NatMX	This study
JRY13019	∆	can1-100, his3-11,15, leu2-3,112, lys2, trp1-1, ura3-1, mat∆::K.l.LEU2, hmlα2∆::yEmRFP, hmrα2∆::yEGFP, SIR4-M.ECOGII-NatMX	This study
JRY13021	∆	can1-100, his3-11,15, leu2-3,112, lys2, trp1-1, ura3-1, mat∆::HphMX, SIR4-M.ECOGII-NatMX	This study
JRY13022	∆	can1-100, his3-11,15, leu2-3,112, lys2, trp1-1, ura3-1, mat∆::HphMX, SIR4-M.ECOGII-NatMX	This study
JRY13027	∆	can1-100, his3-11,15, leu2-3,112, lys2, trp1-1, ura3-1, mat∆::HphMX, SIR3-M.ECOGII-NatMX	This study
JRY13029	∆	can1-100, his3-11,15, leu2-3,112, lys2, trp1-1, ura3-1, mat∆::HphMX, sir3∆::M.ECOGII-NatMX	This study
JRY13030	∆	can1-100, his3-11,15, leu2-3,112, lys2, trp1-1, ura3-1, mat∆::HphMX, sir3∆::M.ECOGII-NatMX	This study
JRY13114	∆	can1-100, his3-11,15, leu2-3,112, lys2, trp1-1, ura3-1, mat∆::KanMX, sir3-8-M.ECOGII-NatMX	This study
JRY13134	∆	can1-100, his3-11,15, leu2-3,112, lys2, trp1-1, ura3-1, mat∆::KanMX, sir3-8-M.ECOGII-NatMX	This study
JRY13438	∆	can1-100, his3-11,15, leu2-3,112, lys2, trp1-1, ura3-1, mat∆::KanMX, sir3-bah∆-M.ECOGII-NatMX	This study
JRY13439	∆	can1-100, his3-11,15, leu2-3,112, lys2, trp1-1, ura3-1, mat∆::KanMX, sir3-bah∆-M.ECOGII-ΝatMX	This study
JRY13467	α	can1-100, his3-11,15, leu2-3,112, lys2, trp1-1, ura3-1, sir3-8-3xV5	This study
JRY13621	∆	can1-100, his3-11,15, leu2-3,112, lys2, trp1-1, ura3-1, mat∆::K.l.LEU2, sir3-bah∆-3xV5-ΝatMX	This study
JRY13625	∆	can1-100, his3-11,15, leu2-3,112, lys2, trp1-1, ura3-1, mat∆::HphMX, SIR2-M.ECOGII-NatMX	This study
JRY13626	∆	can1-100, his3-11,15, leu2-3,112, lys2, trp1-1, ura3-1, mat∆::HphMX, SIR2-M.ECOGII-NatMX	This study
JRY13660	α	can1-100, his3-11,15, leu2-3,112, lys2, trp1-1, ura3-1, hmlα2∆::yEmRFP, hmrα2∆::yEGFP, SIR2-M.ECOGII-NatMX,	This study
JRY13670	∆	can1-100, his3-11,15, leu2-3,112, lys2, trp1-1, ura3-1, mat∆::K.l.LEU2, SIR3-M.ECOGII-NatMX, [YEp24: URA3 2micron]	This study
JRY13671	∆	can1-100, his3-11,15, leu2-3,112, lys2, trp1-1, ura3-1, mat∆::K.l.LEU2, SIR3-M.ECOGII-NatMX, [YEp24: URA3 2micron]	This study
JRY13672	∆	can1-100, his3-11,15, leu2-3,112, lys2, trp1-1, ura3-1, mat∆::K.l.LEU2, SIR3-M.ECOGII-NatMX, [pJR3526: SIR3-M.ECOGII URA3 2micron]	This study
JRY13673	∆	can1-100, his3-11,15, leu2-3,112, lys2, trp1-1, ura3-1, mat∆::K.l.LEU2, SIR3-M.ECOGII-NatMX, [pJR3526: SIR3-M.ECOGII URA3 2micron]	This study
