# Supplementary material for: Distinguishing between recruitment and spread of silent chromatin structures in Saccharomyces cerevisiae
Source: eLife. 2022 Jan 24;11:e75653. doi: 10.7554/eLife.75653 (PMC8830885; doi:10.7554/eLife.75653)
Supplement: Supplementary file 2. [file elife-75653-supp2.xlsx]

## Sheet: Sheet1
Table S1. Plasmids used in this study
Plasmid	Description	Published Source
pJR42 (YEp24)	2μ ori, URA3, AmpR	Botstein et al. 1979
pJR3428	cas9, URA3, ARS4, KanR	Brothers & Rine 2019, Lee et al. 2015
pJR3525	M.ECOGII, NatMX, AmpR	This study
pJR3526	SIR3p-SIR3-M.ECOGII, 2μ ori, URA3, AmpR	This study
