# Supplementary material for: Distinguishing between recruitment and spread of silent chromatin structures in Saccharomyces cerevisiae
Source: eLife. 2022 Jan 24;11:e75653. doi: 10.7554/eLife.75653 (PMC8830885; doi:10.7554/eLife.75653)
Supplement: Supplementary file 3. [file elife-75653-supp3.xlsx]

## Sheet: Sheet1
Table S3. Oligonucleotides used in this study.
Name	Sequence (5' -> 3')
Oligonucleotides used for genome insertions
SIR2-M.ECOGII-NatMX fwd	GGGCGTGTATGTCGTTACATCAGATGAACATCCCAAAACCCTCGGTGGATCTGGTGGATC
SIR2-M.ECOGII-NatMX rev	TATTAATTTGGCACTTTTAAATTATTAAATTGCCTTCTACGAATTCGAGCTCGTTTAAAC
SIR3-M.ECOGII-NatMX fwd	CGCCTTTTCGATGGATGAAGAATTCAAAAATATGGACTGCATTGGTGGATCTGGTGGATC
SIR3-M.ECOGII-NatMX rev	TAGGCATATCTATGGCGGAAGTGAAAATGAATGTTGGTGGGAATTCGAGCTCGTTTAAAC
SIR4-M.ECOGII-NatMX fwd	GATGGAAAAAGATTTTCAAGTGAATAAGGAGATAAAACCGTATGGTGGATCTGGTGGATC
SIR4-M.ECOGII-NatMX rev	ACACTTCGTTACTGGTCTTTTGTAGAATGATAAAAAGTCAGAATTCGAGCTCGTTTAAAC
sir3∆::M.ECOGII-NatMX fwd	TTAAGAAAGTTGTTTTGTTCTAACAATTGGATTAGCTAAAATGGGTGGATCTGGTGGATC
sir3∆::M.ECOGII-NatMX rev	TAGGCATATCTATGGCGGAAGTGAAAATGAATGTTGGTGGGAATTCGAGCTCGTTTAAAC
guide RNA sequences used for CRISPR-Cas9 gene editing
sir3-bah∆ top	gactttAAGTATTCATCAGATTGTTT
sir3-bah∆ bottom	aaacAAACAATCTGATGAATACTTaa
CRISPR repair templates
sir3-bah∆ fwd	ACAGGGGTTTAAGAAAGTTGTTTTGTTCTAACAATTGGATTAGCTAAAATGGTGAGTGGG
sir3-bah∆ rev	AACTCCCATCTTATGCATCACCTGTCTATTTGTCTTCTGCCCACTCACCATTTTAGCTAA
primers used for quantitative PCR
ACT1 fwd	TTTTGTCCTTGTACTCTTCCGGTAGAAC
ACT1 rev	CCAAATCGATTCTCAAAATGGCGTGAG
HMLα2 fwd	TCCACAAATCACAGATGAGT
HMLα2 rev	GTTGGCCCTAGATAAGAATCC
HMRa1 fwd	GGCGGAAAACATAAACAGAAC
HMRa1 rev	GGGTGATATTGATGATTTTCCC
CHA1 fwd	GGAAACGAATGGATGTCATG
CHA1 rev	GTTGTATTTGCGAGCGTATTC
OCA4 fwd	CATTGAGATAGAACAGGAGAAGG
OCA4 rev	GCAAAGGTCATCTTCATTTACTC
SIR3 fwd	ATTGGTAGTGTCACAGGAG
SIR3 rev	CAAGCGTATGACGATTCGT
M.ECOGII fwd	CAACAGGGAAGAAGAACATGG
M.ECOGII rev	ATGATGGGGTTTCTCTAACTCC
M.ECOGII gene block for pJR3525 construction
M.ECOGII	aaccttatgtatcatacacatacgatttaggtgacactatagaacgcggccgccagctgaagcttcgtacgctgcaggggtggatctggtggatctATGTTGAACACGGTGAAAATAAGCTCCTGTGAGCTTATTAATGCTGACTGCCTAGAATTTATCCGTTCTTTACCCGAAAACTCCGTAGATTTAATTGTCACCGACCCGCCGTACTTCAAAGTAAAACCGGAGGGGTGGGACAACCAGTGGAAGGGTGACGATGATTATCTGAAATGGCTGGATCAGTGTTTAGCTCAGTTTTGGCGTGTCTTGAAGCCCGCGGGGAGTCTGTATTTATTCTGTGGCCACAGGTTAGCATCAGATATAGAGATCATGATGCGTGAAAGGTTCAGTGTACTAAAC…
